# Supplementary material for: Characterisation of the Myocardial Mitochondria Structural and Functional Phenotype in a Murine Model of Diabetic Cardiomyopathy
Source: Front Physiol. 2021 Sep 1;12:672252. doi: 10.3389/fphys.2021.672252 (PMC8442993; doi:10.3389/fphys.2021.672252)
Supplement: Supplementary file 2 [file Data_Sheet_1.XLSX]

## Sheet: Gene Expression 
	Treatment	Animal ID	CTGF (fc)	NOX4 (fc)	UPC3 (fc)	SOD2
	Non-diabetic mice	110	0.895927	1.03683	2.1056	0.849663
	Non-diabetic mice	137	1.29779	2.16896	0.476194	0.895625
	Non-diabetic mice	152	1.65692	1.39757	1.59883	1.08138
	Non-diabetic mice	150	0.472045	0.540652	1.5674	#
	Non-diabetic mice	199	0.712126	0.572307	0.839995	0.806267
	Non-diabetic mice	200	0.986594	0.998714	0.727244	0.927125
	Non-diabetic mice	201	1.1564	0.620385	1.03904	0.870574
	Non-diabetic mice	227	0.540978	0.951647	0.295398	1.04763
	Non-diabetic mice	211	1.28122	0.712939	0.350304	0.745958
	Diabetic mice	115	2.38358	1.12003	1.15559	0.907178
	Diabetic mice	123	1.48175	0.562461	1.69963	0.813118
	Diabetic mice	131	1.07835	0.801044	0.578989	0.288091
	Diabetic mice	132	0.465366	0.474826	0.952862	0.21362
	Diabetic mice	133	1.17674	0.799351	2.11445	0.65837
	Diabetic mice	160	1.55746	1.1011	1.2497	0.590133
	Diabetic mice	166	2.16502	0.830331	2.78213	0.671232
	Diabetic mice	197	1.63112	0.910622	1.11608	0.65947
	Diabetic mice	205	1.22565	1.6883	2.47476	0.748844
	Diabetic mice	226	1.64887	0.707816	1.43061	0.75829
	Diabetic mice	237	3.70094	1.60342	2.2507	#
	Diabetic mice	202	1.6312	1.01178	2.94149	0.858801
	Diabetic mice	217	1.06066	2.1566	1.765	0.724017
	Diabetic mice	214	0.944766	1.18202	4.22156	0.934908
		#	Please refer to flow chart of animal use (in Supplementary Figure 3 ) for reason of exclusion

## Sheet: Body weight, Blood glu, HbA1c
		Blood glucose (mmol/L)	2 wks diabetic 8 wks old	4 wks diabetic 10 wks old	6 wks diabetic 12 wks old	8 wks diabetic 14 wks old	10 wks diabetic 16 wks old	12 wks diabetic 18 wks old	14 wks diabetic 20 wks old	16 wks diabetic 22 wks old	18 wks diabetic 24 wks old	20 wks diabetic 26 wks old	22 wks diabetic 28 wks old	24 wks diabetic 30 wks old	26 wks diabetic 32 wks old
	Treatment	Animal ID														HbA1c
	Non-diabetic mice	110	7.9		11.5	8.2	8.4	7.8	7.4	7.8	8	8.5	7.9	8.9	11.5	4.2
	Non-diabetic mice	137	8.8	9.6	8.4	8	9.5	8	7.2	7.5	9.5		7.7	8	5.5	4.3
	Non-diabetic mice	152	9	9.4	8.3	8.1	9.4	7.4	9.8	8	7.7	9.3	8.2	8.3	8.2	4.3
	Non-diabetic mice	150	8	8.7	7.5	9.4	9.8	7.9	9.4	7.2	8.7	8.4	8.3	8.7	6.5	4.1
	Non-diabetic mice	199	9	8.6	6.4	6.4	7.8	8.2	8.4	8.9	8	7.5	6.9	7.3	7.8	4.2
	Non-diabetic mice	200	7.8	7.3	7.8	7.8	8.5	9.4	7.8	8.4	8.3	8.1	7.8	7.4	7.4	4.1
	Non-diabetic mice	201	8.5	7.7	7.6	7.6	8.5	8.8	9.4	8.8	8.3	7.3	8.1	7.4	7.8	4.1
	Non-diabetic mice	227	8.7	9	8.1	8.1	8.5	10	8.6	11	9.1	9.2	8.5	6.9	6.6	4
	Non-diabetic mice	211	8.2	9	8.7	8.7	8	7.6	8.7	8.4	8.3	7.4	8.2	7	7.7	4
	Diabetic mice	115	12.3		12.1	14.4	12	17	12.5	13.4	9.9	14.8	8.9	9.4	8.5	4.5
	Diabetic mice	123	28.1	33	28.1	33	26.9	22.8	18.8	15.9	13.8	15	14.5	11.6	12.5	4.6
	Diabetic mice	131	12.2	14.2	12.9	11.9	10.5	12.2	11.5	10.4	10.5		9.2	13.9	12.2	4.4
	Diabetic mice	132	14	14.9	15.3	11.8	12.1	12.5	9.3	12.1	12.1		13	13.2	11.5	4.6
	Diabetic mice	133	28.2	33	30.3	28.5	25.9	24.4	26.4	24	25.9		18	21.7	13.7	4.9
	Diabetic mice	160	15	19.5	14.9	14.9	17.9	11.5	12.8	16.8	10.9	13	16	12.4	10.9	4.4
	Diabetic mice	166	11.5	14.9	13.9	15.1	14.8	26.7	17.3	18.6	17.2	11	12.9	12.4	8.6	4.4
	Diabetic mice	197	12	13.7	13.4	13.4	14.2	15.9	14	15.7	14.5	9.4	13.5	16.1	14.7	4.8
	Diabetic mice	205	23.9	8	8.4	8.4	8.5	9.5	8.3	9.1	9	8.5	8	9.3	13.2	4.2
	Diabetic mice	226	9	7.5	8.8	8.8	9	10.5	10	12.6	11	8.4	8.3	9.5	13.8	4.3
	Diabetic mice	237	19	24.9	21.9	21.9	18	22	19.3	18.3	20.8	13.5	18.7	17.1	20.4	5.5
	Diabetic mice	202	26.9	26.9	25.3	25.3	25.7	24.7	27.9	25.8	26.4	22.3	18.6	17.4	18	5.6
	Diabetic mice	217	24.9	27.7	23.3	23.3	21.9	22.4	26.3	19.9	18.6	9.3	10.7	11.9	17.1	5
	Diabetic mice	214	12.8	13.7	12.3	12.3	11.5	13.9	14.9	19	11.8	9.7	10.8	12	13	4.5
		Body weight (grams)	0 wks diabetic 6 wks old	2 wks diabetic 8 wks old	4 wks diabetic 10 wks old	6 wks diabetic 12 wks old	8 wks diabetic 14 wks old	10 wks diabetic 16 wks old	12 wks diabetic 18 wks old	14 wks diabetic 20 wks old	16 wks diabetic 22 wks old	18 wks diabetic 24 wks old	20 wks diabetic 26 wks old	22 wks diabetic 28 wks old	24 wks diabetic 30 wks old	26 wks diabetic 32 wks old
	Treatment	Animal ID
	Non-diabetic mice	110	23	28		28	30	29	30	31	33	31	32	33	32	32.4
	Non-diabetic mice	137	21	25	27	27	28	28	29	31	30	28		33	33	25
	Non-diabetic mice	152	21	25	27	29	29	31	32	32	33	33	34	37	36	34
	Non-diabetic mice	150	22	26	28	30	31	32	33	34	35	33	36	39	38	36
	Non-diabetic mice	199	23	25	28	31	32	32	33	34	37	37	35	36	38	37
	Non-diabetic mice	200	25	28	29	32	33	35	35	35	37	39	35	36	36	38
	Non-diabetic mice	201	26	28	31	34	34	35	36	37	40	40	38	38	38	39
	Non-diabetic mice	227	28	33	37	40	42	42	42	45	46	47	35	34	36	40
	Non-diabetic mice	211	24	27	30	29	30	31	31	31	32	31	31	30	31	32
	Diabetic mice	115	20	27		33	33	36	40	41	42	40	39	40	35	34
	Diabetic mice	123	25	29	30	34	34	36	39	38	40	38	38	42	42	40
	Diabetic mice	131	22	29	31	32	34	34	37	38	39	34		40	42	33
	Diabetic mice	132	21	29	31	31	36	38	40	40	41	38		39	40	37
	Diabetic mice	133	21	29	30	28	32	33	35	36	36	33		39	38	36
	Diabetic mice	160	21	30	32	34	35	37	38	39	41	37	34	41	40	39
	Diabetic mice	166	22	30	34	36	40	42	44	44	44	42	39	44	45	44
	Diabetic mice	197	25	30	36	38	39	40	43	43	45	45	36	41	44	49
	Diabetic mice	205	24	27	30	32	31	32	33	34	38	39	41	42	43	43
	Diabetic mice	226	25	31	36	38	40	42	43	44	46	45	42	44	45	45
	Diabetic mice	237	24	29	33	36	37	35	38	40	41	42	37	38	44	46
	Diabetic mice	202	23	28	30	30	30	31	32	33	35	34	32	33	36	38
	Diabetic mice	217	22	27	29	29	29	30	31	32	33	33	32	32	35	36
	Diabetic mice	214	23	28	32	33	33	36	38	40	43	41	35	37	41	41

## Sheet: Glucose tolerance test
	Time (min)	Non-diabetic mice										Diabetic mice
		137	150	152	199	200	201	227	211			123	131	133	132	160	166	197	205	226	202	217	214	237
	0	6.6	6.5	6	8.9	8.2	9.3	8.4	11.2			12.5	15.4	13.1	18.9	11.2	9.3	14.7	13.2	13.6	18	17.1	13	20.4
	15	8.3	10.1	9.8	14.4	12.4	13.8	15.1	21			19	23.6	21.2	27.7	19	16.8	30.2	29.5	26	27.8	30.7	19.8	30.9
	30	8.7	10.4	10.4	16.3	14.6	17.1	16.8	22.1			31.1	30.5	23.4	33	25.4	28.5	33	30.4	31.2	29.5	30.4	28.2	33
	45	9.3	10.6	9.9	14.9	11	18	16.5	24.1			29.9	32.1	31.3	33	27.2	28.6	33	31	29.2	32.5	30.9	32.4	33
	60	9.1	10.4	8.9	12.7	11.3		17	21.5			33	33	25.4	32.1	29.1	26.5	32.4	29.1	29.7	31.7	29.8	30.2	33
	90	7.5	7.7	7	11.8	10.2	13.3	13.8	15.4			24.5	31.8	27.7	24.7	24.5	20.8	33	26.2	25.2	27.2	26.6	29	30.8
	120	7.4	6.9	6.7	10.6	9.5	9.5	11.6	13.2			17.5	26.2	19.8	30.6	21.1	14.7	25	23.3	18.5	24.3	24.9	22.2	27.4
	150	6.9	7	6.3	9.5	7.9	8.7	9.2	11.7			12.7	19.3	13.3	25	17.6	13	20.6	18.8	21	22.1	21.7	15.8	23.8
	Area under the curve
	Non-diabetic mice								Diabetic mice
	137	150	152	199	200	201	227	211	123	131	132	133	160	166	197	205	226	202	217	214	237
	209.3	317.3	302.3	516	366.9	616.5	811.5	929.3	1597	1585	1453	1027	1304	1369	1692	1491	1114	1071	1145	1600	1141

## Sheet: Body composition
	EchoMRI
	Non diabetic mice	Mouse ID	Fat (g)	Lean (g)
		110	6.17	24.75
		137	2.85	19.61
		150	9.17	25.34
		152	8.39	24.57
		199	8.08	24.76
		200	7.45	26.69
		201	7.32	27.95
		227	8.86	32.68
		211	3.44	28.2
	Diabetic mice	115	8.08	23.84
		123	12.63	26.29
		131	11.59	25.82
		132	10.29	25.04
		133	8.26	25.59
		160	12.67	26.07
		166	15.12	27.73
		197	10.87	29.98
		205	13.37	25.86
		226	13.64	27.68
		202	7.33	26.22
		217	6.43	26.81
		214	9.76	26.58
		237	13.26	26.76

## Sheet: LV cardiac fibrosis
	Values are % of total LV area
		Collagen 1 (RED)					Collagen 3 (GREEN)					Total collagen
		Animal ID	ND				Animal ID	ND				Animal ID	ND
	Non diabetic mice	110	0.626882			Non diabetic mice	110	0.224			Non diabetic mice	110	0.850882
		137	0.668412				137	0.236294				137	0.904706
		150	0.641471				150	0.203				150	0.844471
		152	0.5866				152	0.211067				152	0.797667
		199	0.708636				199	0.272636				199	0.981273
		200	0.1428				200	0.0577				200	0.2005
		201	0.3272				201	0.168333				201	0.495533
		211	0.342889				211	0.189667				211	0.532556
		227	0.453222				227	0.272722				227	0.725944
	Diabetic mice	115	0.747917			Diabetic mice	0.272667	115			Diabetic mice	1.02058	115
		123	0.47075				0.216875	123				0.687625	123
		131	3.06959				1.17659	131				4.24618	131
		132	0.4804				0.1915	132				0.6719	132
		133	0.533167				0.200944	133				0.734111	133
		160	1.85129				0.821619	160				2.6729	160
		166	0.937471				0.325882	166				1.26335	166
		197	3.393				2.04811	197				5.44111	197
		202	0.498444				0.265722	202				0.764167	202
		205	0.403737				0.225842	205				0.629579	205
		214	2.05169				1.06781	214				3.1195	214
		217	2.33514				0.869143	217				3.20429	217
		226	0.396636				0.232	226				0.628636	226
		237	0.523154				0.321038	237				0.844192	237

## Sheet: LV functional analysis
		Non-Diabetic mice
	Animal ID	110	137	150	152	199	200	201	227	211
Heart Rate (bpm)		403	352	421	440	386	336	374	335	392
E Velocity (mm/s)		901.925	812.735	858.224	771.578	759.387	664.105	628.863	617.116	785.492
A Velocity (mm/s)		254.214	240.875	329.686	318.856	333.88	179.862	301.249	228.155	247.734
E/A ratio		3.54789	3.3741	2.60315	2.41984	2.27443	3.69231	2.08752	2.7048	3.17071
Deceleration time (ms)		23.8889	20.8333	19.7222	16.3889	13.6111	14.7222	17.5	21.6667	12.5
e' velocity (mm/s)		20.8323	31.2324	33.0245	35.0725	33.4355	32.8571	30.7746	33.7826	39.0274
a' velocity (mm/s)		11.9042	13.1842	22.0163	16.1282	19.3209	14.8088	14.6931	18.7424	19.5908
e'/a' ratio		1.75	2.36893	1.5	2.1746	1.73054	2.21875	2.09449	1.80247	1.99213
		Diabetic mice
	Animal ID	115	123	131	132	133	160	166	197	202	205	217	214	226	237
Heart Rate (bpm)		345	338	327	345	342	377	416	383	351	385	376	370	362	380
E Velocity (mm/s)		901.925	710.114	878.802	976.274	856.147	837.646	605.869	534.886	662.799	600.148	574.043	799.849	730.672	683.683
A Velocity (mm/s)		254.214	316.148	271.201	351.29	477.91	440.159	400.086	212.493	373.037	230.766	292.112	400.447	294.723	267.313
E/A ratio		3.54789	2.24615	3.24042	2.77911	1.79144	1.90305	1.51435	2.5172	1.77677	2.60068	1.96515	1.99739	2.47919	2.55762
Deceleration time (ms)		23.8889	22.0833	24.4444	31.6667	30.2778	23.3333	26.3889	20.2778	29.7222	24.4444	16.1111	20	30.2778	21.3889
e' velocity (mm/s)		20.8323	23.4243	24.4483	20.4803	20.9923	23.5523	21.6003	#	34.1297	29.1549	27.6123	31.8544	24.7585	31.7001
a' velocity (mm/s)		11.9042	16.6082	14.0802	19.4563	18.5603	17.5362	21.4083	#	18.2797	12.0322	16.5057	20.902	14.5774	15.3873
e'/a' ratio		1.75	1.4104	1.73636	1.05263	1.13103	1.34307	1.00897	#	1.86709	2.42308	1.6729	1.52398	1.69841	2.06015
				#	Please refer to flow chart of animal use (in Supplementary Figure 3 ) for reason of exclusion

## Sheet: Promethion metabolic caging
				Energy expenditure (Kcal/hour)												Energy expenditure (Kcal/hour)
			ND	ND	ND	ND	ND	ND	ND	ND	ND		D	D	D	D	D	D	D	D	D	D	D	D	D	D
		Mouse ID	110	137	150	152	199	200	201	227	211		115	123	131	132	133	160	166	197	205	226	202	217	214	237		ND	D
	StartTime	EndTime																										Ave	Ave
	07:00:00	08:00:00	0.479314	0.419438	0.393038	0.445438	0.52616	0.579816	0.677628	0.683054	0.58946		0.593469	0.50955	0.443572	0.544711	0.58052	0.570233	0.608046	0.566348	0.608683	0.522468	0.501895	0.597716	0.704708	0.704411		0.532594	0.575452
	08:00:00	09:00:00	0.519099	0.448385	0.423383	0.47765	0.477387	0.647122	0.510773	0.556584	0.568279		0.556742	0.505245	0.488421	0.560361	0.564186	0.498906	0.590864	0.715978	0.64812	0.615732	0.617478	0.442661	0.585962	0.665421		0.514296	0.575434
	09:00:00	10:00:00	0.521344	0.39893	0.456022	0.505451	0.424549	0.522731	0.5373	0.613454	0.548149		0.534381	0.48545	0.448532	0.623957	0.515172	0.570303	0.617213	0.571511	0.656688	0.541006	0.532848	0.4418	0.592824	0.523126		0.503103	0.546772
	10:00:00	11:00:00	0.507054	0.480135	0.419835	0.509302	0.463304	0.594977	0.558914	0.751804	0.497522		0.52269	0.638809	0.443373	0.533547	0.615588	0.514407	0.594753	0.605515	0.560726	0.526627	0.479291	0.583163	0.687541	0.562871		0.531427	0.562064
	11:00:00	12:00:00	0.489591	0.398361	0.416613	0.478802	0.464315	0.496837	0.497877	0.5473	0.50804		0.533446	0.51131	0.517925	0.57062	0.512846	0.478169	0.685491	0.680337	0.568746	0.541377	0.681336	0.489264	0.597216	0.526155		0.477526	0.563874
	12:00:00	13:00:00	0.485324	0.38175	0.458804	0.598343	0.563924	0.437833	0.578454	0.512622	0.471697		0.646291	0.510474	0.462939	0.579685	0.551265	0.589242	0.594682	0.581247	0.533073	0.564152	0.614679	0.53355	0.601238	0.509705		0.49875	0.562302
	13:00:00	14:00:00	0.455192	0.487364	0.460669	0.467025	0.476504	0.612969	0.700224	0.561966	0.509557		0.526131	0.523077	0.53096	0.554167	0.509069	0.534517	0.595302	0.588413	0.529857	0.527554	0.48751	0.511363	0.71474	0.580501		0.525719	0.55094
	14:00:00	15:00:00	0.589268	0.574872	0.38878	0.538428	0.426918	0.430389	0.520776	0.603822	0.62186		0.511023	0.489831	0.459345	0.634991	0.684208	0.483971	0.662195	0.594478	0.530358	0.565236	0.519445	0.532297	0.561152	0.565277		0.521679	0.5567
	15:00:00	16:00:00	0.459753	0.37623	0.412547	0.519945	0.482079	0.560179	0.612706	0.795972	0.534522		0.538649	0.657201	0.630675	0.50801	0.655389	0.521619	0.708466	0.575568	0.60774	0.625857	0.598722	0.489868	0.588635	0.575439		0.528215	0.59156
	16:00:00	17:00:00	0.57482	0.500346	0.40633	0.543047	0.595618	0.655948	0.581094	0.574371	0.646206		0.547661	0.543202	0.47688	0.600549	0.527366	0.495065	0.619518	0.679578	0.544611	0.549217	0.584487	0.644129	0.613484	0.561151		0.564198	0.570493
	17:00:00	18:00:00	0.584791	0.385581	0.475228	0.562875	0.470626	0.626508	0.570721	0.703033	0.572714		0.534006	0.526404	0.591996	0.598372	0.653442	0.565825	0.715213	0.73288	0.539682	0.610772	0.672356	0.515178	0.756015	0.719304		0.550231	0.623675
	18:00:00	19:00:00	0.502381	0.615745	0.653944	0.572356	0.532913	0.523603	0.674789	0.649811	0.74972		0.58101	0.609641	0.571601	0.587449	0.714381	0.537006	0.625327	0.753124	0.607216	0.601243	0.624788	0.626712	0.702035	0.796222		0.608362	0.638411
	19:00:00	20:00:00	0.628534	0.582116	0.513527	0.611585	0.52803	0.617256	0.589269	0.711378	0.663336		0.622508	0.615664	0.706277	0.690677	0.719358	0.579736	0.756048	0.859296	0.756924	0.66661	0.669449	0.616043	0.647258	0.655946		0.605003	0.682985
	20:00:00	21:00:00	0.598515	0.677054	0.627502	0.638891	0.636906	0.617749	0.709725	0.803979	0.816805		0.670213	0.766009	0.695208	0.722052	0.802006	0.686285	0.70339	0.804437	0.817081	0.697876	0.860843	0.618599	0.75914	0.812103		0.680792	0.743946
	21:00:00	22:00:00	0.695108	0.662454	0.663334	0.742776	0.705383	0.6102	0.747333	0.702631	0.837334		0.590197	0.609031	0.601887	0.716126	0.787266	0.67853	0.738315	0.829121	0.788389	0.778396	0.794542	0.630262	0.762446	0.883275		0.707395	0.727699
	22:00:00	23:00:00	0.65477	0.635568	0.633074	0.731715	0.693579	0.490064	0.688143	0.84883	0.838084		0.623857	0.677942	0.586993	0.680753	0.733938	0.67014	0.846069	0.83313	0.687565	0.7552	0.621587	0.602779	0.809391	0.868914		0.690425	0.714161
	23:00:00	00:00:00	0.671606	0.492325	0.576892	0.551668	0.654351	0.589072	0.715767	0.74924	0.88533		0.641891	0.610478	0.522156	0.746092	0.742477	0.639187	0.833634	0.643808	0.8087	0.728316	0.549511	0.539579	0.710053	0.793347		0.654028	0.679231
	00:00:00	01:00:00	0.557368	0.515244	0.636813	0.694875	0.641009	0.514827	0.592446	0.804959	0.883464		0.680515	0.657272	0.502026	0.674489	0.592337	0.655537	0.66504	0.828924	0.746778	0.737241	0.835014	0.561637	0.695692	0.639894		0.649	0.6766
	01:00:00	02:00:00	0.502437	0.508474	0.404254	0.530008	0.534695	0.474389	0.512455	0.781251	0.876169		0.572609	0.530007	0.448772	0.619929	0.504389	0.589957	0.738018	0.613739	0.678416	0.760656	0.696265	0.497099	0.751632	0.527367		0.569348	0.609204
	02:00:00	03:00:00	0.545206	0.432273	0.420692	0.579481	0.445693	0.492325	0.578792	0.751859	0.871146		0.53914	0.549081	0.388089	0.640705	0.606054	0.617669	0.782564	0.731392	0.565285	0.610548	0.539223	0.459391	0.613671	0.637877		0.568608	0.591478
	03:00:00	04:00:00	0.557941	0.469282	0.4366	0.505173	0.512045	0.558956	0.553594	0.551626	0.845568		0.559004	0.630039	0.432831	0.522802	0.550329	0.548955	0.666921	0.656816	0.743723	0.570378	0.526205	0.501633	0.546529	0.529838		0.554532	0.570429
	04:00:00	05:00:00	0.42777	0.397568	0.453564	0.462124	0.452419	0.43522	0.525783	0.464168	0.815083		0.556056	0.537195	0.439303	0.605502	0.668971	0.495017	0.600266	0.663836	0.627447	0.643779	0.596768	0.456269	0.706301	0.575847		0.492633	0.583754
	05:00:00	06:00:00	0.473955	0.494924	0.358516	0.457736	0.445502	0.420832	0.580215	0.662478	0.641665		0.641969	0.501998	0.419093	0.563133	0.608611	0.530953	0.631061	0.580905	0.573322	0.587675	0.517169	0.445479	0.594272	0.51738		0.503981	0.55093
	06:00:00	07:00:00	0.536477	0.397818	0.394005	0.55251	0.518301	0.595097	0.669353	0.473804	0.545952		0.542166	0.618667	0.454209	0.579428	0.560729	0.464394	0.5967	0.765303	0.663916	0.549552	0.516258	0.486311	0.604091	0.660242		0.520369	0.575855
	Light	Total	6.16793	5.46714	5.36519	6.21866	5.9043	6.68891	7.02126	7.5538	6.81773		6.6255	6.51019	6.06622	6.89642	7.08343	6.35926	7.61707	7.64498	6.9355	6.79124	6.91484	6.4077	7.70555	7.28958
	Light	Average	0.513994	0.455595	0.447099	0.518222	0.492025	0.557409	0.585105	0.629483	0.568144		0.552125	0.542516	0.505518	0.574701	0.590286	0.529939	0.634756	0.637082	0.577958	0.565937	0.576236	0.533975	0.642129	0.607465
	Light	SEM	0.0128185	0.0217289	0.0196128	0.0128379	0.0144661	0.0210799	0.018843	0.0243827	0.0212931		0.0104938	0.0162612	0.0175426	0.010261	0.0199968	0.0103452	0.0127107	0.0193522	0.012737	0.0104558	0.0194186	0.0184208	0.0181284	0.0252545
	Light	n	12	12	12	12	12	12	12	12	12		12	12	12	12	12	12	12	12	12	12	12	12	12	12
	Dark	Total	6.84969	6.2651	6.11877	7.05854	6.76791	6.41599	7.46287	8.3062	9.51994		7.24013	7.30338	6.19685	7.76169	7.87646	7.15636	8.55803	8.81071	8.45755	8.08623	7.72283	6.41508	8.20048	8.10203
	Dark	Average	0.570807	0.522092	0.509898	0.588212	0.563993	0.534666	0.621906	0.692184	0.793328		0.603344	0.608615	0.516404	0.646807	0.656372	0.596363	0.713169	0.734226	0.704795	0.673852	0.64357	0.53459	0.683373	0.675169
	Dark	SEM	0.0225856	0.0268558	0.0308633	0.0269859	0.0268248	0.0199457	0.0220964	0.0358722	0.03099		0.0137884	0.0201989	0.0297977	0.0192844	0.0274246	0.0205143	0.0232264	0.0271886	0.0238314	0.0222348	0.0352045	0.0191492	0.022521	0.0367535
	Dark	n	12	12	12	12	12	12	12	12	12		12	12	12	12	12	12	12	12	12	12	12	12	12	12
	24 hr	Total	13.0176	11.7322	11.484	13.2772	12.6722	13.1049	14.4841	15.86	16.3377		13.8656	13.8136	12.2631	14.6581	14.9599	13.5156	16.1751	16.4557	15.393	14.8775	14.6377	12.8228	15.906	15.3916
	24 hr	Average	0.542401	0.488843	0.478499	0.553217	0.528009	0.546038	0.603505	0.660833	0.680736		0.577734	0.575566	0.510961	0.610754	0.623329	0.563151	0.673962	0.685654	0.641377	0.619895	0.609903	0.534283	0.662751	0.641317
	24 hr	SEM	0.0142207	0.0185581	0.0193748	0.0165617	0.0169163	0.0146948	0.0149979	0.0226116	0.0296926		0.0101186	0.0146156	0.0173247	0.0131702	0.0182617	0.0133389	0.0154695	0.0194096	0.0187115	0.0164996	0.0212447	0.0132857	0.0150558	0.0233431
	24 hr	n	24	24	24	24	24	24	24	24	24		24	24	24	24	24	24	24	24	24	24	24	24	24	24

## Sheet: LV ROS production
		Lucigenin measuring superoxide levels								Hydrogen peroxide levels (ug/ul)					Superoxide/H2O2 ratio
		Raw data (relative light units)			Normalised to Batch
		Animal ID			Animal ID					Animal ID	Conc (ug/ul)			Non diabetic mice	Animal ID
	Non diabetic mice	110	9246.53		110	1			Non diabetic mice	110	0.156544				110	6.38798
		137	20016.5		137	1				137	0.0642596				137	15.5619
		150	19675.4		150	0.895245				150	0.0426566				150	20.9873
		152	24279.9		152	1.10476				152	0.0339292				152	32.5606
		199	3288.12		199	1.14897				199	0.0684078				199	16.7959
		200	2650.9		200	0.92631				200	0.0365151				200	25.3679
		201	3460.46		201	1.20919				201	0.0594111				201	20.353
		227	2047.68		227	0.715523				227	0.165217				227	4.3308
		211	#		211	#				211	0.0750342
														Diabetic mice	115	18.437
	Diabetic mice	115	19284.9		115	2.08564			Diabetic mice	115	0.113122				131	39.0652
		123	#		123	#				123	0.018737				132	40.3378
		131	53870.4		131	2.6913				131	0.0688927				133	35.5715
		132	40053.1		132	2.001				132	0.0496062				160	12.6725
		133	22853.9		133	1.14176				133	0.0320975				166	180.92
		160	23733.7		160	1.0799				160	0.0852162				197	45.0994
		166	149047		166	6.78173				166	0.0374848				205	41.3797
		197	5199.54		197	1.81688				197	0.0402862				226	133.644
		205	2467.65		205	0.862273				205	0.020838				202	26.9946
		226	10689.5		226	3.73526				226	0.0279493				217	90.2895
		202	3232.92		202	1.12968				202	0.0418485				214	16.0871
		217	10005.8		217	3.49636				217	0.0387239				237	45.5314
		214	2809.57		214	0.981753				214	0.0610272
		237	5347.62		237	1.86863				237	0.0410404
					#	Please refer to flow chart of animal use (in Supplementary Figure 3 ) for reason of exclusion

## Sheet: Western blot analysis
			Values expressed in fold change
	Animal ID	Treatment	DRP1/calnexin	NOX4/ calnexin	MFN1/ calnexin	MFN2/ calnexin	complex1/calnexin	complex2/calnexin	complex3/calnexin	complex4/calnexin	complex5/calnexin
	110	ND	0.552763	0.837145	0.546936	1.08689	0.271945	1.01853	0.755968	0.717225	0.888798
	137	ND	1.17506	1.12475	1.91634	1.26938	0.927162	0.889683	0.915947	0.94301	0.967041
	152	ND	0.714574	0.901472	1.14176	1.04838	0.359383	0.735251	0.737023	0.6819	0.855331
	150	ND	1.26358	0.995206	0.588668	0.728052	1.08807	0.989987	1.10676	0.888901	0.799607
	199	ND	1.25752	1.37556	0.761933	0.931086	2.611	1.14508	1.36093	1.70946	1.41855
	200	ND	1.03649	0.765864	1.04437	0.936215	0.742441	1.22147	1.12337	1.0595	1.07067
	201	ND	0.886007	1.22654	1.02781	1.04192	0.725929	0.903438	0.800372	0.801674	0.866633
	227	ND	0.787113	0.921869	#	#	1.01675	0.989801	1.12806	1.17854	1.09007
	211	ND	1.32688	0.851589	0.972195	0.958079	1.25732	1.10676	1.07157	1.01978	1.0433
	115	D	1.11246	0.886616	1.46976	0.846178	0.509039	1.12236	0.979029	0.792478	1.2955
	123	D	1.67834	1.02557	0.712032	0.90543	0.300628	0.811624	1.10083	0.557852	1.00772
	131	D	1.16811	0.81746	0.393517	0.754667	0.411999	1.00036	0.963306	0.611479	0.949698
	132	D	0.89477	0.958501	0.436752	0.892596	0.773252	1.40214	1.45075	1.17779	1.31546
	133	D	1.12858	1.16589	0.24554	0.693522	2.38169	1.63748	1.91251	2.06825	1.98865
	160	D	1.2578	0.668786	0.642343	0.982373	1.6479	1.22167	1.6116	1.4796	1.49945
	202	D	0.507024	0.740891	0.824344	0.998009	0.759049	0.943993	0.833357	1.02443	0.954343
	217	D	0.3947	0.959878	0.80114	0.824693	0.887041	0.617551	0.836457	0.891531	0.893008
	214	D	1.05841	1.46059	0.847728	0.814288	1.81226	0.629469	0.999115	1.45262	1.03937
	166	D	1.12973	1.11486	1.00536	1.05112	3.02756	1.48572	1.78429	1.8946	1.47151
	197	D	1.11261	#	0.906767	0.937645	2.75177	1.26296	1.58126	1.9092	1.35965
	205	D	1.57943	0.904266	0.827621	0.892767	2.11025	1.32185	1.37309	1.7142	1.2417
	226	D	2.58021	0.520211	0.783307	0.926367	3.41851	1.28925	1.83984	2.03706	1.57476
	237	D	0.958918	0.67878	0.698549	0.809743	2.73262	1.13791	1.62398	1.80553	1.22772
				#	Please refer to flow chart of animal use (in Supplementary Figure 3 ) for reason of exclusion

## Sheet: LV mitochondria structure
				(um)		(um²)
		Animal ID	Mitochondria count (um)	Mitochondria length	Mitochondria width	Mitochondria area	Lipid droplet count	Lipid droplet/mitochondria ratio
	Non-diabetic mice	199	342.049	1.18866	0.791471	0.728843	14	0.0673077
		200	350.271	1.12868	0.730906	1.17908	5	0.0234742
		201	481.829	1.0682	0.705545	0.573653	15	0.0511945
		211	241.737	1.48876	0.935195	1.09392	5	0.0340136
		227	340.405	1.27859	0.794915	0.755125	10	0.0483092
	Diabetic mice	197	473.606	0.975078	0.624062	0.480642	24	0.0833333
		202	286.137	1.14704	0.710793	0.671336	20	0.114943
		205	323.96	1.12827	0.682151	0.605077	23	0.116751
		214	338.76	1.0185	0.694439	0.589484	19	0.092233
		217	323.96	1.18745	0.630223	0.590181	12	0.0609137
		226	266.404	1.20483	0.71851	0.704834	19	0.117284
		237	309.16	1.22703	0.754237	0.736186	19	0.101064

[truncated: 1 more sheets: LV mitochondria function]
